# Supplementary material for: A Fluorescent Nanosensor for Silver (Ag+) and Mercury (Hg2+) Ions Using Eu (III)-Doped Carbon Dots
Source: MDPI journal article supplement (doi:10.3390/nano12030385), 2022-01-25
Supplement: s1 [file s1]

## Electronic Supplementary Information

*Article*

# A fluorescent nanosensor for silver ( $\text{Ag}^+$ ) and mercury ( $\text{Hg}^{2+}$ ) ions using Eu(III) doped carbon dots

Cátia Correia, José Martinho and Ermelinda Maçôas\*

Centro de Química Estrutural (CQE) and Institute of Molecular Science, Instituto Superior Técnico, Universidade de Lisboa, 1049-001 Lisboa, Portugal; catia.correia@tecnico.ulisboa.pt (C.C.), jgmartinho@tecnico.ulisboa.pt (J.M.), ermelinda.macoas@tecnico.ulisboa.pt (E.M)

\* Correspondence: ermelinda.macoas@tecnico.ulisboa.pt

**Table S1.** High resolution XPS spectra of the C1s and O1s peaks of the Cdots and Eu-Cdots with the attribution to functional groups and the corresponding atomic percentages.

|      | BE (eV)<br>Cdots (Eu-Cdots) | assignment                                                                              | Cdots<br>(%) | Eu-Cdots<br>(%) |
|------|-----------------------------|-----------------------------------------------------------------------------------------|--------------|-----------------|
| C1s, | 285.0 (285.0)               | C=C/C-C                                                                                 | 53.8         | 42.4            |
|      | 286.8<br>(286.6)            | C-OH/C=O<br>COH/COC                                                                     | 17.8         | 16.5            |
|      | 288.5<br>(288.6)            | O-C=O/N-C=O<br>COO <sup>-</sup> ...Eu <sup>3+</sup>                                     | 27.7         | 29.5            |
|      | 290.2<br>(289.7)            | O-COO <sup>-</sup><br>O-COO <sup>-</sup> ....Eu <sup>3+</sup>                           | 0.7          | 11.6            |
| O1s  | 531.5<br>(531.6)            | C=O<br>COO <sup>-</sup> ...Eu <sup>3+</sup> /<br>O-COO <sup>-</sup> ...Eu <sup>3+</sup> | 58.5         | 81.5            |
|      | 532.6<br>(532.8)            | COH<br>O-COO <sup>-</sup> ....Eu <sup>3+</sup>                                          | 32.8         | 14.7            |
|      | 533.5 (534.0)               | H <sub>2</sub> O                                                                        | 8.7          | 3.8             |
| N1s  | 398.4 (398.7)               | sp <sup>2</sup> C-N=C                                                                   | 10.1         | 6.5             |
|      | 399.9 (400.2)               | sp <sup>3</sup> >N-C=O                                                                  | 87.5         | 67.5            |
|      | 401.4 (402.0)               | >N <sup>+</sup> =C, -NH <sup>+</sup> <sub>3</sub>                                       | 2.4          | 26.0            |

**Table S2.** Decay parameters of the C-dots and Eu-cdots emission in the absence and presence of 100  $\mu$ M of Ag<sup>+</sup> and Hg<sup>2+</sup>

| Decay parameters                  | Cdots          | Eu-Cdots       | Eu-Cdots +<br>Ag <sup>+</sup> (100 $\mu$ M) | Eu-Cdots +<br>Hg <sup>2+</sup> (100 $\mu$ M) |
|-----------------------------------|----------------|----------------|---------------------------------------------|----------------------------------------------|
| $\tau_1$ /ns<br>(a <sub>1</sub> ) | 3.11<br>(0.40) | 3.00<br>(0.26) | 2.19<br>(0.34)                              | 4.78<br>(0.21)                               |
| $\tau_2$ /ns<br>(a <sub>2</sub> ) | 8.60<br>(0.20) | 7.90<br>(0.23) | 8.50<br>(0.14)                              | 12.27<br>(0.53)                              |
| $\tau_3$ /ns<br>(a <sub>3</sub> ) | 0.67<br>(0.40) | 0.67<br>(0.52) | 0.50<br>(0.52)                              | 1.00<br>(0.26)                               |
| $\tau_{av}$ /ns                   | 3.23           | 2.95           | 2.19                                        | 7.77                                         |
| $\chi^2$                          | 1.0            | 1.0            | 1.1                                         | 1.1                                          |

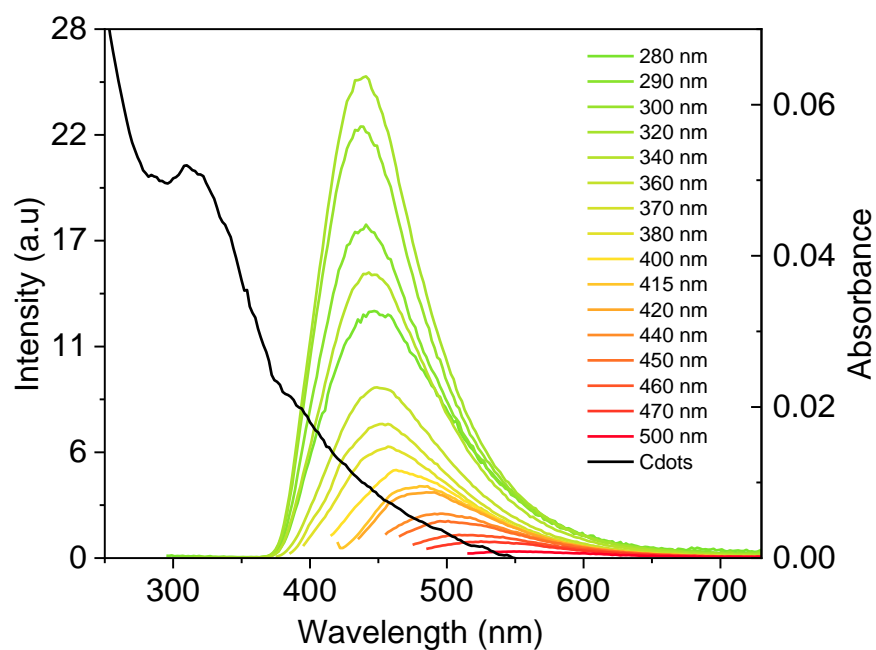

**Figure S1.** Absorption spectrum (black) and luminescence spectra (green to red) of undoped Cdots. Excitation at several wavelengths is shown.

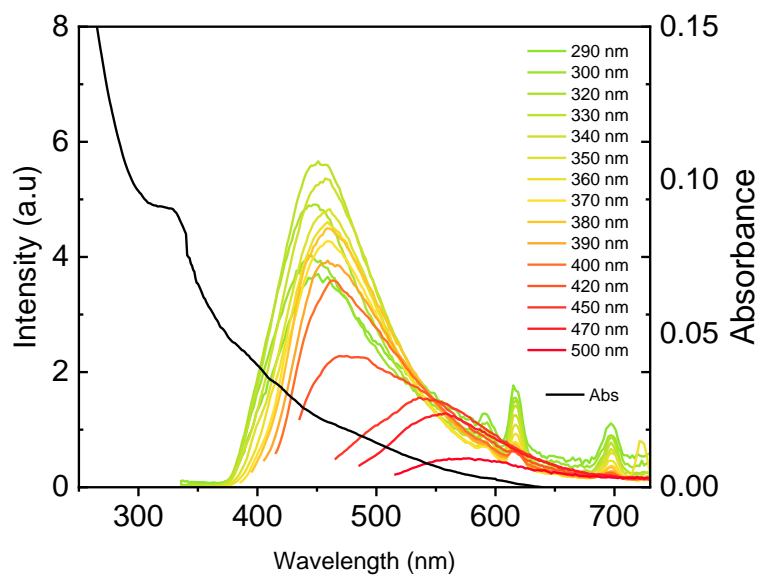

**Figure S2.** Absorption spectrum (black) and luminescence spectra of the Eu-Cdots upon excitation at several wavelengths (green to red).

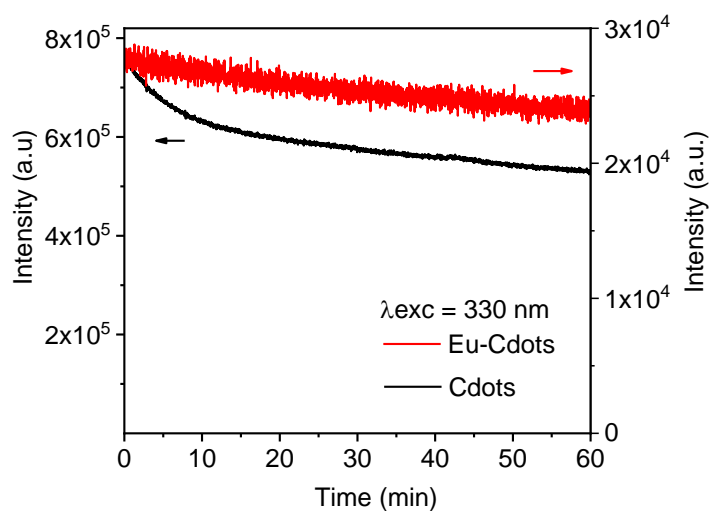

**Figure S3.** Photostability of Cdots and Eu-Cdots. Emission intensity of Cdots (black) and Eu-Cdots (red) under irradiation at 330 nm.

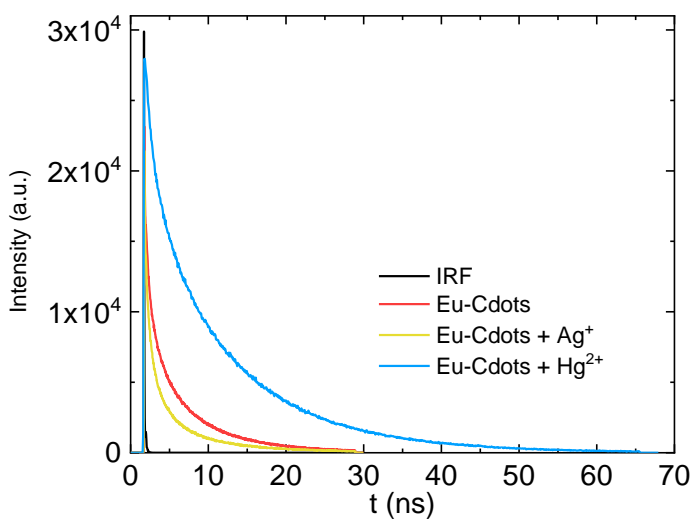

**Figure S4.** Emission decay curves for Eu-Cdots (red), and Eu-Cdots in the presence of 100 mM of  $\text{Ag}^+$  (yellow) and  $\text{Hg}^{2+}$  (blue). The Instrumental response function (IRF) is shown in black.
